# Supplementary material
Source: Springer Nature journal article supplement (https://www.springermedizin.de/resource/supplementary/12990_2010_351_MOESM2_ESM.pdf/9613096)

**A**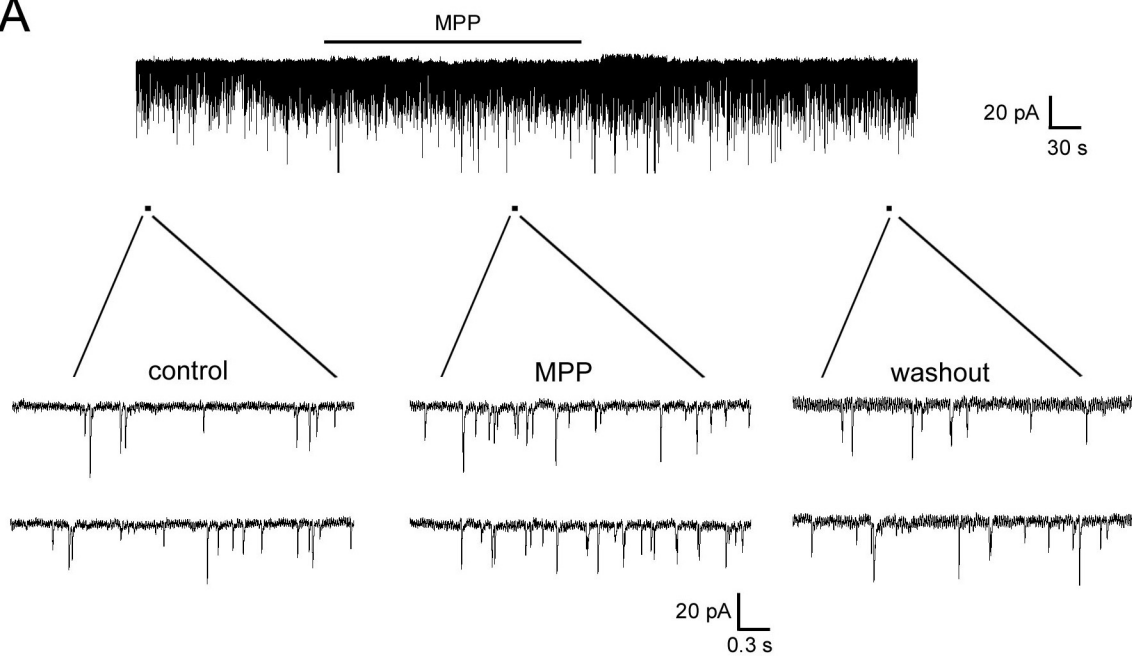**B**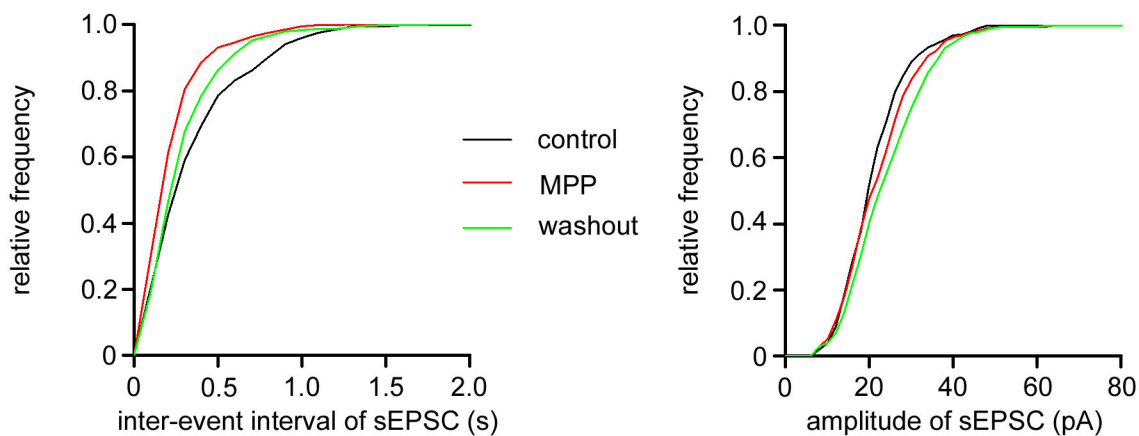**C**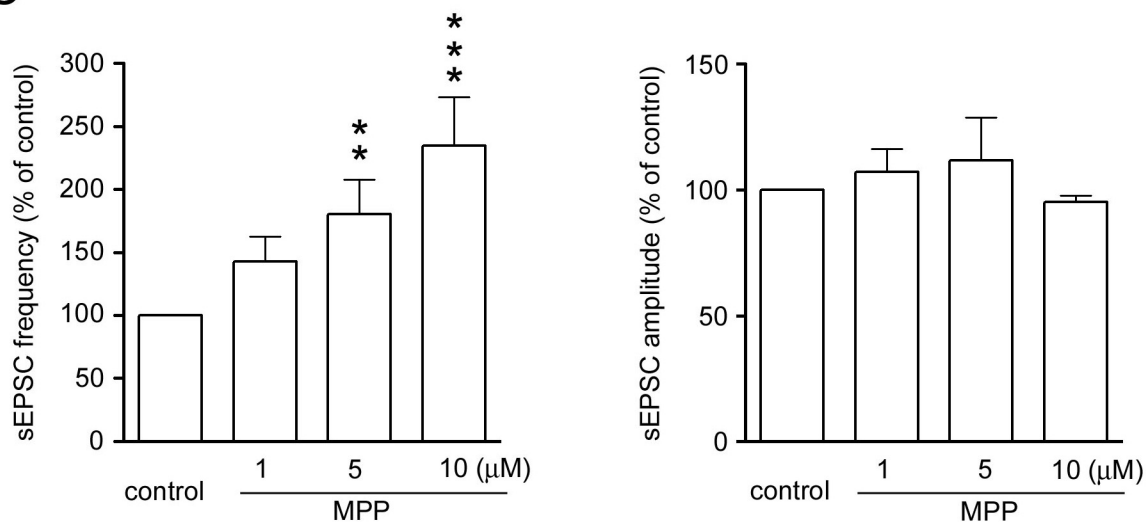

Supplement: MOESM2 [file 9613096]
